# Supplementary material for: Examination of Cluster Groups of Risk Behaviors and Beliefs Associated with Non-Communicable Diseases with Latent Class Analysis: A Cross-Sectional Study in Rural Bangladesh
Source: MDPI journal article supplement (doi:10.3390/healthcare11162279), 2023-08-12
Supplement: s1 [file s1]

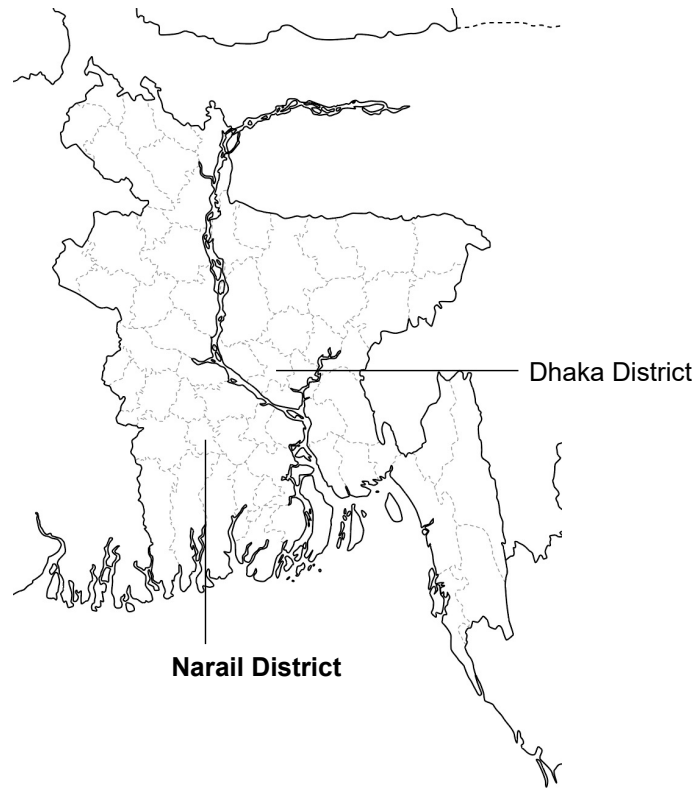

**Figure S1. The map of the study sight (Narail district) in Bangladesh.**

**Table S1. Participant characteristics by the presence of hypertension**

|                                                    | No hypertension<br>(n = 369) | Hypertension<br>(n = 231) |
|----------------------------------------------------|------------------------------|---------------------------|
| Age (median [IQR])                                 | 42 [37–52]                   | 55 [45–60]                |
| Sex female                                         | 161 (43.6)                   | 119 (51.5)                |
| BMI                                                |                              |                           |
| 18.5–25                                            | 223 (60.4)                   | 116 (50.2)                |
| $\leq 18.5$                                        | 37 (10.0)                    | 15 (6.5)                  |
| 25–30                                              | 92 (24.9)                    | 74 (32.0)                 |
| $\geq 30$                                          | 17 (4.6)                     | 26 (11.3)                 |
| Income                                             |                              |                           |
| Under 200 USD                                      | 244 (66.1)                   | 152 (65.8)                |
| 200–400 USD                                        | 110 (29.8)                   | 72 (31.2)                 |
| 400–600 USD                                        | 13 (3.5)                     | 6 (2.6)                   |
| 600–800 USD                                        | 2 (0.5)                      | 1 (0.4)                   |
| Smoking habit (yes)                                | 99 (26.8)                    | 66 (28.6)                 |
| Frequency of adding salt to food                   |                              |                           |
| Always                                             | 179 (48.5)                   | 81 (35.1)                 |
| Often                                              | 13 (3.5)                     | 17 (7.4)                  |
| Sometimes                                          | 55 (14.9)                    | 39 (16.9)                 |
| Rarely                                             | 59 (16.0)                    | 45 (19.5)                 |
| Never                                              | 63 (17.1)                    | 49 (21.2)                 |
| Frequency of eating processed food high in salt    |                              |                           |
| Always                                             | 0 (0.0)                      | 0 (0.0)                   |
| Often                                              | 0 (0.0)                      | 0 (0.0)                   |
| Sometimes                                          | 20 (5.4)                     | 7 (3.0)                   |
| Rarely                                             | 202 (54.7)                   | 130 (56.3)                |
| Never                                              | 147 (39.8)                   | 94 (40.7)                 |
| Belief about lowering salt intake in diet          |                              |                           |
| Very important                                     | 98 (26.6)                    | 61 (26.4)                 |
| Somewhat important                                 | 213 (57.7)                   | 143 (61.9)                |
| Not at all important                               | 58 (15.7)                    | 26 (11.3)                 |
| Too much salt in diet could cause health problems. |                              |                           |
| Yes                                                | 329 (89.2)                   | 212 (91.8)                |

Data are n (%) unless specified otherwise. IQR = interquartile range

**Table S2. Participant characteristics by risk behaviors and belief groups**

|                                                                | Very high-risk<br>group (n = 58) | High-risk<br>group<br>(n = 270) | Moderate-risk<br>group<br>(n = 272) |
|----------------------------------------------------------------|----------------------------------|---------------------------------|-------------------------------------|
| Age (median [IQR])                                             | 54.5 [45–60]                     | 48.5 [40–56]                    | 42 [33.5–55]                        |
| Sex (female)                                                   | 29 (50.0)                        | 137 (50.7)                      | 114 (41.9)                          |
| Education years (median [IQR])                                 | 0 [0–5]                          | 5 [0–9]                         | 8 [0–10]                            |
| Income                                                         |                                  |                                 |                                     |
| Under 200 USD                                                  | 47 (81.0)                        | 179 (66.3)                      | 170 (62.5)                          |
| 200–400 USD                                                    | 11 (19.0)                        | 88 (32.6)                       | 83 (30.5)                           |
| 400–600 USD                                                    | 0 (0.0)                          | 3 (1.1)                         | 16 (5.9)                            |
| 600–800 USD                                                    | 0 (0.0)                          | 0 (0.0)                         | 3 (1.1)                             |
| Occupation                                                     |                                  |                                 |                                     |
| Student                                                        | 0 (0.0)                          | 0 (0.0)                         | 7 (2.6)                             |
| Service work                                                   | 0 (0.0)                          | 2 (0.7)                         | 3 (1.1)                             |
| Agriculture and fishing                                        | 22 (37.9)                        | 99 (36.7)                       | 79 (29.0)                           |
| Own business                                                   | 6 (10.3)                         | 54 (20.0)                       | 68 (25.0)                           |
| Housewife                                                      | 28 (48.3)                        | 101 (37.4)                      | 82 (30.2)                           |
| Employed                                                       | 2 (3.5)                          | 14 (5.2)                        | 33 (12.1)                           |
| Number of household members (median [IQR])                     | 4.5 [3–6]                        | 5 [4–6]                         | 4 [4–6]                             |
| Medicine taken                                                 | 7 (12.1)                         | 85 (31.5)                       | 59 (21.7)                           |
| Previous hypertension diagnosis                                | 6 (10.3)                         | 60 (22.2)                       | 50 (18.4)                           |
| Previous diabetes diagnosis                                    | 2 (3.5)                          | 35 (13.0)                       | 24 (8.8)                            |
| Previous dyslipidemia diagnosis                                | 1 (1.7)                          | 3 (1.1)                         | 4 (1.5)                             |
| BMI                                                            |                                  |                                 |                                     |
| Normal (18.5–25)                                               | 35 (60.3)                        | 150 (55.6)                      | 154 (56.6)                          |
| Underweight ( $\leq 18.5$ )                                    | 13 (22.4)                        | 19 (7.0)                        | 20 (7.4)                            |
| Overweight (25–29)                                             | 8 (13.8)                         | 81 (30.0)                       | 77 (28.3)                           |
| Obesity ( $30 \leq$ )                                          | 2 (3.5)                          | 20 (7.4)                        | 21 (7.7)                            |
| Hypertension (found during the survey or diagnosed previously) | 18 (31.0)                        | 108 (40.0)                      | 105 (38.6)                          |
| Diabetes (found during the survey or diagnosed previously)     | 1 (1.7)                          | 30 (11.1)                       | 28 (10.3)                           |

Data are n (%) unless specified otherwise. IQR = interquartile range

Table S3. Association between eating processed food and diabetes, BMI

|                                                        | Frequency of eating processed food high in salt |            |            |
|--------------------------------------------------------|-------------------------------------------------|------------|------------|
|                                                        | Sometimes                                       | Rarely     | Never      |
| Diabetes (found during survey or diagnosed previously) |                                                 |            |            |
| No                                                     | 25 (4.9)                                        | 286 (55.8) | 202 (39.4) |
| Yes                                                    | 2 (2.3)                                         | 46 (52.9)  | 39 (44.8)  |
| BMI                                                    |                                                 |            |            |
| Normal (18.5–24.9)                                     | 11 (3.2)                                        | 189 (55.8) | 139 (41.0) |
| Underweight (< 18.5)                                   | 1 (1.9)                                         | 31 (59.6)  | 20 (38.5)  |
| Overweight (25–29.9)                                   | 13 (7.8)                                        | 86 (51.8)  | 67 (40.4)  |
| Obesity (> 30)                                         | 2 (4.7)                                         | 26 (60.5)  | 15 (34.9)  |

Data are n (%) unless specified otherwise.
